# Supplementary material
Source: PubMed Central journal article supplement (PMC10017897)
Supplement: 40121_2023_762_MOESM1_ESM.pdf [file 40121_2023_762_MOESM1_ESM.pdf]

# **The Use and Effectiveness of Ceftazidime-Avibactam in Real-World Clinical Practice: EZTEAM**

## **Study**

Alex Soriano<sup>1</sup>, Philippe Montravers<sup>2</sup>, Matteo Bassetti<sup>3</sup>, Galina Klyasova<sup>4</sup>, George Daikos<sup>5</sup>, Paurus Irani<sup>6</sup>,  
Gregory Stone<sup>7</sup>, Richard Chambers<sup>8</sup>, Pascale Peeters<sup>9</sup>, Mitesh Shah<sup>10</sup>, Claire Hulin<sup>9</sup>, Natalia  
Albuquerque<sup>11</sup>, Efim Basin<sup>12</sup>, Benjamin Gaborit<sup>13</sup>, Irene Kourbeti<sup>14</sup>, Menichetti Francesco<sup>15</sup>, María Teresa  
Perez-Rodriguez<sup>16</sup>, Mathias W. Pletz<sup>17</sup>, Marisa Sanchez<sup>18</sup>, Ivan Trompa<sup>19</sup>, Anita Verma<sup>20</sup>, Maria Lavinea  
N. de Figueiredo<sup>21</sup>, Claudie Charbonneau<sup>22</sup>

### Affiliations:

1. Department of Infectious Diseases, Hospital Clínic, Helios Building, Villarroel 170, Barcelona, Spain
2. Department of Anaesthesiology and Surgical Critical Care Unit, CHU Bichat Claude Bernard, Assistance Publique-Hôpitaux de Paris; Université de Paris-Cité, Paris, France
3. Clinica Malattie Infettive, Ospedale Policlinico, San Martino IST- IRCCS, Genova, Italy
4. National Medical Research Center for Hematology, Moscow, Russian Federation
5. Piniou 10, 152 35 Vrilissia, Attiki, Greece
6. Pfizer Ltd, UK
7. Pfizer, Groton, USA
8. Pfizer Inc, New York, USA
9. IQVIA Real-World Solutions, Courbevoie, France
10. IQVIA Real-World Solutions, Bengaluru, India
11. Hospital Felício Rocho, Belo Horizonte, Brazil
12. Regional Clinical Hospital #1, Krasnodar, Russia
13. Department of Infectious Diseases, University Hospital of Nantes and Centre d'Investigation Clinique 1413, INSERM, Nantes, France
14. General Hospital of Athens Laiko, Athens, Greece

15. Azienda Ospedaliero Universitaria Pisana, Pisa, Italy
16. Galicia Sur Health Research Institute, Complejo Hospitalario Universitario de Vigo, Vigo, Spain
17. Institute for Infectious Diseases and Infection Control, Jena University Hospital, Jena, Germany
18. Hospital Italiano de Buenos Aires, Ciudad Autónoma Buenos Aires, Argentina
19. IPS Universitaria, Medellin, Colombia
20. Kings College Hospital NHS Foundation Trust, London, UK
21. Global Medical Affairs, Pfizer, Sao Paulo, Brazil
22. Pfizer P.I.O., Paris, France

**Corresponding Author:**

Dr Claudie Charbonneau

Senior Director, Patient & Health Impact,

Global Team Lead, Pfizer P.I.O., Paris, France

Tel: +33 1 58 07 30 23

Email: [Claudie.Charbonneau@pfizer.com](mailto:Claudie.Charbonneau@pfizer.com)

## SUPPLEMENTARY MATERIALS

**Table S1. Definitions of categories of clinical outcome**

|                     |                        |               |                                                                                                                                                                                                                                                                                                                                                                                                                                                                                                                                                                                                                                                                        |
|---------------------|------------------------|---------------|------------------------------------------------------------------------------------------------------------------------------------------------------------------------------------------------------------------------------------------------------------------------------------------------------------------------------------------------------------------------------------------------------------------------------------------------------------------------------------------------------------------------------------------------------------------------------------------------------------------------------------------------------------------------|
| Clinical Evaluation | Clinical Success       | Cure          | <p>Resolution of all signs and symptoms of infection with no need for escalation of antimicrobials.</p> <p>De-escalation of antibiotic therapy is considered a treatment success unless ceftazidime-avibactam was used in a regimen with one or more other antibiotics and is the only antibiotic de-escalated.</p>                                                                                                                                                                                                                                                                                                                                                    |
|                     | Clinical Failure       | Failure       | <p>Inadequate response to ceftazidime-avibactam therapy or resistant, worsening, or new recurrent signs and symptoms at the end of ceftazidime-avibactam therapy.</p> <p>This may include antimicrobial escalation (ceftazidime-avibactam dose increase, or additional antibiotic) after 4 days of treatment, discontinuation of ceftazidime-avibactam without clinical cure (e.g. AE, insufficient effect), or readmission to a hospital with the same infection within 60 days of the initial hospital discharge date. This may also include cIAI patients who required an additional unplanned source control procedure after ceftazidime-avibactam initiation.</p> |
|                     | Clinical Indeterminate | Indeterminate | <p>There is not enough information to conclude whether the antibiotic regimen containing ceftazidime-avibactam was a clinical failure or a success.</p>                                                                                                                                                                                                                                                                                                                                                                                                                                                                                                                |

**Table S2. Demographic, baseline characteristics, and source of infection by indication (FAS72-)**

| Characteristic                   | cIAI<br>(N=12) | cUTI<br>(N=7) | HAP/VAP<br>(N=10) | Other<br>(N=24) [1] | TOTAL<br>(N=53) |
|----------------------------------|----------------|---------------|-------------------|---------------------|-----------------|
| Age (years)                      |                |               |                   |                     |                 |
| Mean (SD)                        | 58.2 (21.0)    | 60.9 (19.5)   | 62.0 (15.0)       | 59.2 (18.1)         | 59.7 (18.0)     |
| Median                           | 61.5           | 68.0          | 58.5              | 62.5                | 62.0            |
| Q1, Q3                           | 41.0, 73.5     | 40.0, 77.0    | 53.0, 74.0        | 52.5, 71.0          | 52.0, 73.0      |
| Min, Max                         | 21, 90         | 32, 80        | 41, 86            | 25, 99              | 21, 99          |
| Age group, n (%)                 |                |               |                   |                     |                 |
| <40                              | 2 (16.7)       | 1 (14.3)      | -                 | 4 (16.7)            | 7 (13.2)        |
| 40-49                            | 2 (16.7)       | 1 (14.3)      | 2 (20.0)          | 1 (4.2)             | 6 (11.3)        |
| 50-59                            | 1 (8.3)        | 1 (14.3)      | 4 (40.0)          | 5 (20.8)            | 11 (20.8)       |
| 60-69                            | 3 (25.0)       | 1 (14.3)      | -                 | 6 (25.0)            | 10 (18.9)       |
| 70-79                            | 2 (16.7)       | 2 (28.6)      | 3 (30.0)          | 7 (29.2)            | 14 (26.4)       |
| 80-89                            | 1 (8.3)        | 1 (14.3)      | 1 (10.0)          | -                   | 3 (5.7)         |
| ≥90                              | 1 (8.3)        | -             | -                 | 1 (4.2)             | 2 (3.8)         |
| Gender, n (%)                    |                |               |                   |                     |                 |
| n                                | 12             | 7             | 10                | 24                  | 53              |
| Male                             | 8 (66.7)       | 6 (85.7)      | 5 (50.0)          | 14 (58.3)           | 33 (62.3)       |
| Female                           | 4 (33.3)       | 1 (14.3)      | 5 (50.0)          | 10 (41.7)           | 20 (37.7)       |
| Source of infection, n (%)       |                |               |                   |                     |                 |
| Healthcare-associated infections | 3 (25.0)       | 3 (42.9)      | 3 (30.0)          | 4 (16.7)            | 13 (24.5)       |
| Hospital-acquired infections     | 9 (75.0)       | 3 (42.9)      | 7 (70.0)          | 17 (70.8)           | 36 (67.9)       |
| Community-acquired infections    | -              | 1 (14.3)      | -                 | 3 (12.5)            | 4 (7.5)         |

FAS72- analysis set included all patients exposed to ceftazidime-avibactam <72 hours.

BSI: Bloodstream infection; cIAI: Complicated Intra-Abdominal Infection; cUTI: Complicated Urinary Tract Infection; HAP: Hospital-Acquired Pneumonia; Max: Maximum; Min: Minimum; Q1: Quartile one; Q3: Quartile three; SD: Standard deviation; VAP: Ventilator-Associated Pneumonia

Note: Healthcare-associated infections and hospital-acquired infections are not mutually exclusive, in principle healthcare-associated infections include the hospital-acquired infections.

[1] Includes patients with BSI/sepsis.

*Demographic, baseline Characteristics, and source of infection (FAS72-)*

The mean (SD) age of FAS72- patients (n=53) was 59.7 (18.0) years, and most of them (14, 26.4%) belonged to the 70-79 years age group. The majority (33, 62.3%) of the FAS72- patients were males.

Similar to the FAS72+ data set, causes for contracting infections in patients with cUTI were either hospital-acquired or healthcare-associated (42.9% each).

**Table S3. Clinical evaluation outcome by indication and bacteria identified (genus)**

|                                        | <b>cIAI<br/>(N=18)</b> | <b>cUTI<br/>(N=9)</b> | <b>HAP/VAP<br/>(N=3)</b> | <b>Other<br/>(N=17) [1]</b> | <b>TOTAL<br/>(N=47)</b> |
|----------------------------------------|------------------------|-----------------------|--------------------------|-----------------------------|-------------------------|
| <b>Overall outcome, n (%)</b>          |                        |                       |                          |                             |                         |
| <i>Escherichia coli</i> infection      |                        |                       |                          |                             |                         |
| n                                      | 18                     | 9                     | 3                        | 17                          | 47                      |
| Treatment success                      | 14 (77.8)              | 9 (100)               | 1 (33.3)                 | 16 (94.1)                   | 40 (85.1)               |
| Treatment failure                      | 3 (16.7)               | -                     | 1 (33.3)                 | 1 (5.9)                     | 5 (10.6)                |
| Indeterminate                          | 1 (5.6)                | -                     | 1 (33.3)                 | -                           | 2 (4.3)                 |
| <i>Klebsiella</i> spp. infection       |                        |                       |                          |                             |                         |
| n                                      | 59                     | 78                    | 64                       | 151                         | 352                     |
| Treatment success                      | 38 (64.4)              | 70 (89.7)             | 46 (71.9)                | 126 (83.4)                  | 280 (79.5)              |
| Treatment failure                      | 13 (22.0)              | 5 (6.4)               | 8 (12.5)                 | 15 (9.9)                    | 41 (11.6)               |
| Indeterminate                          | 8 (13.6)               | 3 (3.8)               | 10 (15.6)                | 10 (6.6)                    | 31 (8.8)                |
| <i>Enterobacter</i> spp. infection     |                        |                       |                          |                             |                         |
| n                                      | 9                      | 6                     | 10                       | 15                          | 40                      |
| Treatment success                      | 9 (100)                | 4 (66.7)              | 7 (70.0)                 | 14 (93.3)                   | 34 (85.0)               |
| Treatment failure                      | -                      | 1 (16.7)              | 2 (20.0)                 | 1 (6.7)                     | 4 (10.0)                |
| Indeterminate                          | -                      | 1 (16.7)              | 1 (10.0)                 | -                           | 2 (5.0)                 |
| <i>Pseudomonas</i> spp. infection      |                        |                       |                          |                             |                         |
| n                                      | 7                      | 13                    | 22                       | 32                          | 74                      |
| Treatment success                      | 3 (42.9)               | 12 (92.3)             | 17 (77.3)                | 23 (71.9)                   | 55 (74.3)               |
| Treatment failure                      | 1 (14.3)               | 1 (7.7)               | 1 (4.5)                  | 5 (15.6)                    | 8 (10.8)                |
| Indeterminate                          | 3 (42.9)               | -                     | 4 (18.2)                 | 4 (12.5)                    | 11 (14.9)               |
| Other Gram-negative bacteria infection |                        |                       |                          |                             |                         |
| n                                      | 12                     | 7                     | 22                       | 18                          | 59                      |
| Treatment success                      | 10 (83.3)              | 5 (71.4)              | 12 (54.5)                | 12 (66.7)                   | 39 (66.1)               |
| Treatment failure                      | 1 (8.3)                | -                     | 5 (22.7)                 | 4 (22.2)                    | 10 (16.9)               |
| Indeterminate                          | 1 (8.3)                | 2 (28.6)              | 5 (22.7)                 | 2 (11.1)                    | 10 (16.9)               |

BSI: Bloodstream infection; cIAI: Complicated Intra-Abdominal Infection; cUTI: Complicated Urinary Tract Infection; HAP: Hospital-Acquired Pneumonia; VAP: Ventilator-Associated Pneumonia

The clinical outcomes analysis set included all patients exposed to ceftazidime-avibactam  $\geq 72$  hours and non-missing clinical outcome.

[1] Includes patients with BSI/sepsis.

**Table S4A. Vital status and mortality rates: patients infected by *Escherichia coli***

| Characteristic                                          | cIAI<br>(N=18) | cUTI<br>(N=9) | HAP/VAP<br>(N=3) | Other<br>(N=17) [1] | TOTAL<br>(N=47) |
|---------------------------------------------------------|----------------|---------------|------------------|---------------------|-----------------|
| Patient status at date of last available record, n (%)  |                |               |                  |                     |                 |
| n                                                       | 18             | 9             | 3                | 17                  | 47              |
| Alive                                                   | 16 (88.9)      | 9 (100)       | 1 (33.3)         | 13 (76.5)           | 39 (83.0)       |
| Patient died                                            | 2 (11.1)       | -             | 2 (66.7)         | 4 (23.5)            | 8 (17.0)        |
| Timing of death (if patient died), n (%)                |                |               |                  |                     |                 |
| n                                                       | 2              | -             | 2                | 4                   | 8               |
| During Index hospitalization                            | 2 (100)        | -             | 2 (100)          | 4 (100)             | 8 (100)         |
| Within 30 days of discharge                             | -              | -             | -                | -                   | -               |
| Within 60 days of discharge                             | -              | -             | -                | -                   | -               |
| Total in-hospital mortality rate                        | 2 (11.1)       | -             | 2 (66.7)         | 4 (23.5)            | 8 (17.0)        |
| 95% CI                                                  | 1.4; 34.7      | 0.0; 33.6     | 9.4; 99.2        | 6.8; 49.9           | 7.6; 30.8       |
| Cumulative mortality rate at 30 days post-discharge [2] | 2 (11.1)       | -             | 2 (66.7)         | 4 (23.5)            | 8 (17.0)        |
| 95% CI                                                  | 1.4; 34.7      | 0.0; 33.6     | 9.4; 99.2        | 6.8; 49.9           | 7.6; 30.8       |
| Cumulative mortality rate at 60 days post-discharge [3] | 2 (11.1)       | -             | 2 (66.7)         | 4 (23.5)            | 8 (17.0)        |
| 95% CI                                                  | 1.4; 34.7      | 0.0; 33.6     | 9.4; 99.2        | 6.8; 49.9           | 7.6; 30.8       |

BSI: Bloodstream infection; CI: Confidence interval; cIAI: Complicated Intra-Abdominal Infection; cUTI: Complicated Urinary Tract Infection; HAP: Hospital-Acquired Pneumonia; VAP: Ventilator-Associated Pneumonia

[1] Includes patients with BSI/sepsis.

[2] Cumulative mortality up to 30 days post-discharge, including in-hospital mortality.

[3] Cumulative mortality up to 60 days post-discharge, including in-hospital mortality.

This table uses the pathogen identification in samples taken before the start of ceftazidime-avibactam.

Patients with two or more bacterial pathogen identified may be represented in more than one table.

**Table S4B. Vital status and mortality rates: patients infected by *Klebsiella* spp.**

| Characteristic                                          | cIAI<br>(N=59) | cUTI<br>(N=78) | HAP/VAP<br>(N=64) | Other<br>(N=151) [1] | TOTAL<br>(N=352) |
|---------------------------------------------------------|----------------|----------------|-------------------|----------------------|------------------|
| Patient status at date of last available record, n (%)  |                |                |                   |                      |                  |
| n                                                       | 59             | 78             | 64                | 150                  | 351              |
| Alive                                                   | 38 (64.4)      | 65 (83.3)      | 43 (67.2)         | 102 (68.0)           | 248 (70.7)       |
| Patient died                                            | 21 (35.6)      | 13 (16.7)      | 21 (32.8)         | 48 (32.0)            | 103 (29.3)       |
| Timing of death (if patient died), n (%)                |                |                |                   |                      |                  |
| n                                                       | 21             | 13             | 21                | 47                   | 102              |
| During Index hospitalization                            | 18 (85.7)      | 9 (69.2)       | 20 (95.2)         | 34 (72.3)            | 81 (79.4)        |
| Within 30 days of discharge                             | -              | -              | -                 | 7 (14.9)             | 7 (6.9)          |
| Within 60 days of discharge                             | 3 (14.3)       | 4 (30.8)       | 1 (4.8)           | 6 (12.8)             | 14 (13.7)        |
| Total in-hospital mortality rate                        | 18 (30.5)      | 9 (11.5)       | 20 (31.3)         | 34 (22.5)            | 81 (23.0)        |
| 95% CI                                                  | 19.2; 43.9     | 5.4; 20.8      | 20.2; 44.1        | 16.1; 30.0           | 18.7; 27.8       |
| Cumulative mortality rate at 30 days post-discharge [2] | 18 (30.5)      | 9 (11.5)       | 20 (31.3)         | 41 (27.2)            | 88 (25.0)        |
| 95% CI                                                  | 19.2; 43.9     | 5.4; 20.8      | 20.2; 44.1        | 20.2; 35.0           | 20.6; 29.9       |
| Cumulative mortality rate at 60 days post-discharge [3] | 21 (35.6)      | 13 (16.7)      | 21 (32.8)         | 47 (31.1)            | 102 (29.0)       |
| 95% CI                                                  | 23.6; 49.1     | 9.2; 26.8      | 21.6; 45.7        | 23.8; 39.2           | 24.3; 34.0       |

BSI: Bloodstream infection; CI: Confidence interval; cIAI: Complicated Intra-Abdominal Infection; cUTI: Complicated Urinary Tract Infection; HAP: Hospital-Acquired Pneumonia; VAP: Ventilator-Associated Pneumonia

[1] Includes patients with BSI/sepsis.

[2] Cumulative mortality up to 30 days post-discharge, including in-hospital mortality.

[3] Cumulative mortality up to 60 days post-discharge, including in-hospital mortality.

This table uses the pathogen identification in samples taken before the start of ceftazidime-avibactam.

Patients with two or more bacterial pathogen identified may be represented in more than one table.

**Table S4C. Vital status and mortality rates: patients infected by *Enterobacter* spp.**

| Characteristic                                          | cIAI<br>(N=9) | cUTI<br>(N=6) | HAP/VAP<br>(N=10) | Other<br>(N=15) [1] | TOTAL<br>(N=40) |
|---------------------------------------------------------|---------------|---------------|-------------------|---------------------|-----------------|
| Patient status at date of last available record, n (%)  |               |               |                   |                     |                 |
| n                                                       | 9             | 6             | 10                | 15                  | 40              |
| Alive                                                   | 9 (100)       | 4 (66.7)      | 8 (80.0)          | 10 (66.7)           | 31 (77.5)       |
| Patient died                                            | -             | 2 (33.3)      | 2 (20.0)          | 5 (33.3)            | 9 (22.5)        |
| Timing of death (if patient died), n (%)                |               |               |                   |                     |                 |
| n                                                       | -             | 2             | 2                 | 5                   | 9               |
| During Index hospitalization                            | -             | 1 (50.0)      | 2 (100)           | 4 (80.0)            | 7 (77.8)        |
| Within 30 days of discharge                             | -             | -             | -                 | -                   | -               |
| Within 60 days of discharge                             | -             | 1 (50.0)      | -                 | 1 (20.0)            | 2 (22.2)        |
| Total in-hospital mortality rate                        | -             | 1 (16.7)      | 2 (20.0)          | 4 (26.7)            | 7 (17.5)        |
| 95% CI                                                  | 0.0; 33.6     | 0.4; 64.1     | 2.5; 55.6         | 7.8; 55.1           | 7.3; 32.8       |
| Cumulative mortality rate at 30 days post-discharge [2] | -             | 1 (16.7)      | 2 (20.0)          | 4 (26.7)            | 7 (17.5)        |
| 95% CI                                                  | 0.0; 33.6     | 0.4; 64.1     | 2.5; 55.6         | 7.8; 55.1           | 7.3; 32.8       |
| Cumulative mortality rate at 60 days post-discharge [3] | -             | 2 (33.3)      | 2 (20.0)          | 5 (33.3)            | 9 (22.5)        |
| 95% CI                                                  | 0.0; 33.6     | 4.3; 77.7     | 2.5; 55.6         | 11.8; 61.6          | 10.8; 38.5      |

BSI: Bloodstream infection; CI: Confidence interval; cIAI: Complicated Intra-Abdominal Infection; cUTI: Complicated Urinary Tract Infection; HAP: Hospital-Acquired Pneumonia; VAP: Ventilator-Associated Pneumonia

[1] Includes patients with BSI/sepsis.

[2] Cumulative mortality up to 30 days post-discharge, including in-hospital mortality.

[3] Cumulative mortality up to 60 days post-discharge, including in-hospital mortality.

This table uses the pathogen identification in samples taken before the start of ceftazidime-avibactam.

Patients with two or more bacterial pathogen identified may be represented in more than one table.



**Table S4D. Vital status and mortality rates: patients infected by *Pseudomonas* spp.**

| Characteristic                                          | cIAI<br>(N=7) | cUTI<br>(N=13) | HAP/VAP<br>(N=22) | Other<br>(N=32) [1] | TOTAL<br>(N=74) |
|---------------------------------------------------------|---------------|----------------|-------------------|---------------------|-----------------|
| Patient status at date of last available record, n (%)  |               |                |                   |                     |                 |
| n                                                       | 7             | 13             | 22                | 32                  | 74              |
| Alive                                                   | 3 (42.9)      | 11 (84.6)      | 16 (72.7)         | 22 (68.8)           | 52 (70.3)       |
| Patient died                                            | 4 (57.1)      | 2 (15.4)       | 6 (27.3)          | 10 (31.3)           | 22 (29.7)       |
| Timing of death (if patient died), n (%)                |               |                |                   |                     |                 |
| n                                                       | 4             | 2              | 6                 | 10                  | 22              |
| During Index hospitalization                            | 4 (100)       | 1 (50.0)       | 6 (100)           | 8 (80.0)            | 19 (86.4)       |
| Within 30 days of discharge                             | -             | -              | -                 | 1 (10.0)            | 1 (4.5)         |
| Within 60 days of discharge                             | -             | 1 (50.0)       | -                 | 1 (10.0)            | 2 (9.1)         |
| Total in-hospital mortality rate                        | 4 (57.1)      | 1 (7.7)        | 6 (27.3)          | 8 (25.0)            | 19 (25.7)       |
| 95% CI                                                  | 18.4; 90.1    | 0.2; 36.0      | 10.7; 50.2        | 11.5; 43.4          | 16.2; 37.2      |
| Cumulative mortality rate at 30 days post-discharge [2] | 4 (57.1)      | 1 (7.7)        | 6 (27.3)          | 9 (28.1)            | 20 (27.0)       |
| 95% CI                                                  | 18.4; 90.1    | 0.2; 36.0      | 10.7; 50.2        | 13.7; 46.7          | 17.4; 38.6      |
| Cumulative mortality rate at 60 days post-discharge [3] | 4 (57.1)      | 2 (15.4)       | 6 (27.3)          | 10 (31.3)           | 22 (29.7)       |
| 95% CI                                                  | 18.4; 90.1    | 1.9; 45.4      | 10.7; 50.2        | 16.1; 50.0          | 19.7; 41.5      |

BSI: Bloodstream infection; CI: Confidence interval; cIAI: Complicated Intra-Abdominal Infection; cUTI: Complicated Urinary Tract Infection; HAP: Hospital-Acquired Pneumonia; VAP: Ventilator-Associated Pneumonia

[1] Includes patients with BSI/sepsis.

[2] Cumulative mortality up to 30 days post-discharge, including in-hospital mortality.

[3] Cumulative mortality up to 60 days post-discharge, including in-hospital mortality.

This table uses the pathogen identification in samples taken before the start of ceftazidime-avibactam.

Patients with two or more bacterial pathogen identified may be represented in more than one table.

**Table S4E. Vital status and mortality rates: patients infected by other Gram-negative bacteria**

| Characteristic                                          | cIAI<br>(N=12) | cUTI<br>(N=7) | HAP/VAP<br>(N=22) | Other<br>(N=18) [1] | TOTAL<br>(N=59) |
|---------------------------------------------------------|----------------|---------------|-------------------|---------------------|-----------------|
| Patient status at date of last available record, n (%)  |                |               |                   |                     |                 |
| n                                                       | 12             | 7             | 22                | 18                  | 59              |
| Alive                                                   | 9 (75.0)       | 7 (100)       | 12 (54.5)         | 15 (83.3)           | 43 (72.9)       |
| Patient died                                            | 3 (25.0)       | -             | 10 (45.5)         | 3 (16.7)            | 16 (27.1)       |
| Timing of death (if patient died), n (%)                |                |               |                   |                     |                 |
| n                                                       | 3              | -             | 10                | 3                   | 16              |
| During Index hospitalization                            | 3 (100)        | -             | 10 (100)          | 3 (100)             | 16 (100)        |
| Within 30 days of discharge                             | -              | -             | -                 | -                   | -               |
| Within 60 days of discharge                             | -              | -             | -                 | -                   | -               |
| Total in-hospital mortality rate                        | 3 (25.0)       | -             | 10 (45.5)         | 3 (16.7)            | 16 (27.1)       |
| 95% CI                                                  | 5.5; 57.2      | 0.0; 41.0     | 24.4; 67.8        | 3.6; 41.4           | 16.4; 40.3      |
| Cumulative mortality rate at 30 days post-discharge [2] | 3 (25.0)       | -             | 10 (45.5)         | 3 (16.7)            | 16 (27.1)       |
| 95% CI                                                  | 5.5; 57.2      | 0.0; 41.0     | 24.4; 67.8        | 3.6; 41.4           | 16.4; 40.3      |
| Cumulative mortality rate at 60 days post-discharge [3] | 3 (25.0)       | -             | 10 (45.5)         | 3 (16.7)            | 16 (27.1)       |
| 95% CI                                                  | 5.5; 57.2      | 0.0; 41.0     | 24.4; 67.8        | 3.6; 41.4           | 16.4; 40.3      |

BSI: Bloodstream infection; CI: Confidence interval; cIAI: Complicated Intra-Abdominal Infection; cUTI: Complicated Urinary Tract Infection; HAP: Hospital-Acquired Pneumonia; VAP: Ventilator-Associated Pneumonia

[1] Includes patients with BSI/sepsis.

[2] Cumulative mortality up to 30 days post-discharge, including in-hospital mortality.

[3] Cumulative mortality up to 60 days post-discharge, including in-hospital mortality.

This table uses the pathogen identification in samples taken before the start of ceftazidime-avibactam.

Patients with two or more bacterial pathogen identified may be represented in more than one table.

**Table S5. Logistic regression models for clinical success at initial hospitalization**

|                                    | n (%)      | Odds ratio | 95% CI      | p-value |
|------------------------------------|------------|------------|-------------|---------|
| Age (continuous)                   | 459 (100)  | 0.99       | 0.97, 1.00  | 0.0601  |
| Age class                          |            |            |             |         |
| <60                                | 216 (47.1) | Ref        |             |         |
| 60 - 69                            | 106 (23.1) | 0.65       | 0.32, 1.33  | 0.2385  |
| 70 - 79                            | 93 (20.3)  | 0.61       | 0.29, 1.25  | 0.1781  |
| 80+                                | 44 (9.6)   | 0.37       | 0.16, 0.85  | 0.0186  |
| Baseline BMI (kg/m <sup>2</sup> )  | 459 (100)  | 1.03       | 0.96, 1.09  | 0.4418  |
| Gender                             | 459 (100)  |            |             |         |
| Male                               | 310 (67.5) | 1.58       | 0.91, 2.76  | 0.1045  |
| Female                             | 149 (32.5) | Ref        |             |         |
| Alcohol use                        | 459 (100)  |            |             |         |
| Yes                                | 32 (7.0)   | 2.32       | 0.53, 10.13 | 0.2622  |
| No                                 | 276 (60.1) | Ref        |             |         |
| Smoking status                     | 262 (57.1) |            |             |         |
| Current smoker                     | 33 (7.2)   | 0.65       | 0.22, 1.92  | 0.4345  |
| Previous smoker                    | 75 (16.3)  | 1.13       | 0.44, 2.87  | 0.8030  |
| Never smoked                       | 154 (33.6) | Ref        |             |         |
| Recent hospitalization [1]         | 457 (99.6) |            |             |         |
| Yes                                | 225 (49.0) | 2.01       | 1.13, 3.57  | 0.0177  |
| No                                 | 232 (50.5) | Ref        |             |         |
| LOS of prior hospitalization       | 214 (46.6) | 1.00       | 0.99, 1.01  | 0.7995  |
| History of antibiotic exposure [1] | 457 (99.6) |            |             |         |
| Yes                                | 237 (51.6) | 1.01       | 0.58, 1.75  | 0.9823  |
| No                                 | 220 (47.9) | Ref        |             |         |
| Recent healthcare procedure [2]    | 456 (99.3) |            |             |         |
| Yes                                | 276 (60.1) | 0.62       | 0.34, 1.12  | 0.1136  |
| No                                 | 180 (39.2) | Ref        |             |         |
| Patients with bacteremia, n (%)    | 459 (100)  |            |             |         |
| Primary                            | 90 (19.6)  | 0.92       | 0.45, 1.87  | 0.8097  |
| Secondary                          | 110 (24.0) | 0.83       | 0.43, 1.58  | 0.5677  |
| No                                 | 259 (56.4) | Ref        |             |         |
| Immunocompromised status           | 459 (100)  |            |             |         |
| Yes                                | 225 (49.0) | 0.70       | 0.41, 1.21  | 0.2053  |
| No                                 | 234 (51.0) | Ref        |             |         |

|                                                                      | <b>n (%)</b> | <b>Odds ratio</b> | <b>95% CI</b> | <b>p-value</b> |
|----------------------------------------------------------------------|--------------|-------------------|---------------|----------------|
| DCCI score                                                           | 459 (100)    | 0.99              | 0.92, 1.06    | 0.7559         |
| Indication                                                           | 459 (100)    |                   |               |                |
| cIAI                                                                 | 76 (16.6)    | 0.21              | 0.08, 0.57    | 0.0020         |
| cUTI                                                                 | 97 (21.1)    | Ref               |               |                |
| HAP/VAP                                                              | 92 (20.0)    | 0.37              | 0.13, 1.00    | 0.0504         |
| Other [3]                                                            | 194 (42.3)   | 0.52              | 0.20, 1.32    | 0.1661         |
| Source of admission                                                  | 457 (99.6)   |                   |               |                |
| Outpatient                                                           | 331 (72.1)   | 0.65              | 0.25, 1.73    | 0.3918         |
| Long-term care facility                                              | 17 (3.7)     | 0.87              | 0.15, 4.98    | 0.8776         |
| Transfer from acute care hospital                                    | 61 (13.3)    | 2.25              | 0.51, 9.92    | 0.2849         |
| Other                                                                | 48 (10.5)    | Ref               |               |                |
| Ward admitted to at initial hospitalization                          | 459 (100)    |                   |               |                |
| ICU                                                                  | 101 (22.0)   | 1.48              | 0.72, 3.03    | 0.2869         |
| Other                                                                | 358 (78.0)   | Ref               |               |                |
| Source of infection                                                  | 459 (100)    |                   |               |                |
| Hospital-acquired infections                                         | 318 (69.3)   | 1.04              | 0.38, 2.82    | 0.9418         |
| Healthcare-associated infections [4]                                 | 106 (23.1)   | 1.44              | 0.46, 4.47    | 0.5290         |
| Community-acquired infections                                        | 35 (7.6)     | Ref               |               |                |
| Patients with lower dose of ceftazidime-avibactam (renal impairment) | 459 (100)    |                   |               |                |
| Yes                                                                  | 81 (17.6)    | 0.84              | 0.42, 1.66    | 0.6085         |
| No                                                                   | 378 (82.4)   | Ref               |               |                |
| Patient's infection by multi-resistant pathogen                      | 362 (78.9)   |                   |               |                |
| Yes                                                                  | 277 (60.3)   | 1.43              | 0.71, 2.88    | 0.3132         |
| No                                                                   | 85 (18.5)    | Ref               |               |                |
| Bacteria identified                                                  | 459 (100)    |                   |               |                |
| <i>Escherichia coli</i>                                              |              |                   |               |                |
| Yes                                                                  | 47 (10.2)    | 1.29              | 0.49, 3.41    | 0.6023         |
| No                                                                   | 412 (89.8)   | Ref               |               |                |
| <i>Klebsiella pneumoniae</i>                                         |              |                   |               |                |
| Yes                                                                  | 281 (61.2)   | 0.90              | 0.51, 1.58    | 0.7187         |
| No                                                                   | 178 (38.8)   | Ref               |               |                |
| <i>Klebsiella spp.</i>                                               |              |                   |               |                |
| Yes                                                                  | 51 (11.1)    | 1.87              | 0.65, 5.39    | 0.2470         |
| No                                                                   | 408 (88.9)   | Ref               |               |                |
| <i>Enterobacter cloacae</i>                                          |              |                   |               |                |
| Yes                                                                  | 34 (7.4)     | 2.53              | 0.59, 10.84   | 0.2115         |
| No                                                                   | 425 (92.6)   | Ref               |               |                |
| <i>Enterobacter spp.</i>                                             |              |                   |               |                |
| Yes                                                                  | 7 (1.5)      | 0.37              | 0.07, 1.94    | 0.2387         |
| No                                                                   | 452 (98.5)   | Ref               |               |                |
| <i>Pseudomonas aeruginosa</i>                                        |              |                   |               |                |

|                                                                                       | <b>n (%)</b> | <b>Odds ratio</b> | <b>95% CI</b> | <b>p-value</b> |
|---------------------------------------------------------------------------------------|--------------|-------------------|---------------|----------------|
| Yes                                                                                   | 61 (13.3)    | 0.73              | 0.35, 1.54    | 0.4101         |
| No                                                                                    | 398 (86.7)   | Ref               |               |                |
| <i>Pseudomonas</i> spp.                                                               |              |                   |               |                |
| Yes                                                                                   | 9 (2.0)      | 1.21              | 0.15, 9.83    | 0.8603         |
| No                                                                                    | 450 (98.0)   | Ref               |               |                |
| Other Gram-negative bacteria                                                          |              |                   |               |                |
| Yes                                                                                   | 59 (12.9)    | 0.42              | 0.21, 0.82    | 0.0111         |
| No                                                                                    | 400 (87.1)   | Ref               |               |                |
| Patients with Gram-negative bacteria by beta-lactamase Ambler's types                 | 348 (100)    |                   |               |                |
| KPC                                                                                   |              |                   |               |                |
| Yes                                                                                   | 105 (30.2)   | 0.81              | 0.41, 1.62    | 0.5556         |
| No                                                                                    | 243 (69.8)   | Ref               |               |                |
| MBL                                                                                   |              |                   |               |                |
| Yes                                                                                   | 46 (13.2)    | 2.06              | 0.61, 6.98    | 0.2442         |
| No                                                                                    | 302 (86.8)   | Ref               |               |                |
| OXA-48                                                                                |              |                   |               |                |
| Yes                                                                                   | 54 (15.5)    | 1.80              | 0.61, 5.27    | 0.2841         |
| No                                                                                    | 294 (84.5)   | Ref               |               |                |
| ESBL                                                                                  |              |                   |               |                |
| Yes                                                                                   | 36 (10.3)    | 1.53              | 0.45, 5.22    | 0.5008         |
| No                                                                                    | 312 (89.7)   | Ref               |               |                |
| Other [5]                                                                             |              |                   |               |                |
| Yes                                                                                   | 19 (5.5)     | 0.70              | 0.19, 2.50    | 0.5792         |
| No                                                                                    | 329 (94.5)   | Ref               |               |                |
| >1 beta-lactamase identified                                                          |              |                   |               |                |
| Yes                                                                                   | 17 (4.9)     | 0.41              | 0.13, 1.32    | 0.1348         |
| No                                                                                    | 331 (95.1)   | Ref               |               |                |
| Antibiotics used for Gram-negative bacteria before the start of ceftazidime-avibactam | 459 (100)    |                   |               |                |
| Yes (ceftazidime-avibactam as second line)                                            | 350 (76.3)   | 1.20              | 0.65, 2.22    | 0.5691         |
| No (ceftazidime-avibactam as first line)                                              | 109 (23.7)   | Ref               |               |                |
| Colistin use                                                                          | 459 (100)    |                   |               |                |
| Concomitant to ceftazidime-avibactam                                                  | 47 (10.2)    | 0.38              | 0.19, 0.79    | 0.0092         |
| Subsequent to ceftazidime-avibactam                                                   | 12 (2.6)     | 0.66              | 0.14, 3.08    | 0.5927         |
| Both concomitant and subsequent use                                                   | 3 (0.7)      | -                 | - , -         | 0.9906         |
| No usage                                                                              | 397 (86.5)   | Ref               |               |                |

BSI: Bloodstream infection; BMI: body mass index; CI: Confidence interval; cIAI: Complicated Intra-Abdominal Infection; cUTI: Complicated Urinary Tract Infection; DCCI: Deyo-Charlson Comorbidity Index, ESBL: Extended spectrum beta-lactamase; HAP: Hospital-Acquired Pneumonia; ICU: Intensive care Unit; KPC: Klebsiella pneumoniae carbapenemase; LOS: length of stay; MBL: Metallo-beta-lactamase; OXA-48: Oxacillinase 48; VAP: Ventilator-Associated Pneumonia

[1] Within 90 days prior to date of admission for index hospitalization.

[2] Within 30 days prior to initiation of ceftazidime-avibactam.

[3] Includes patients with BSI/sepsis.

[4] Excluding hospital-acquired infections.

[5] Other includes Ampicillinase C, CTX-M, Cephalosporinases, Penicillinases, Serine beta-lactamase, CARBA-R.

This analysis was conducted on patients with clinical success or failure at the initial hospitalization (excluding patients with indeterminate clinical outcome). It examined the association of several variables with clinical success.

**Table S6. List of primary investigators, and Ethics Committees approvals**

| Country       | Center ID | PI name              | Center address                                                                                                                     | Ethics Committee address                                                                                                                                              | Date of approval |
|---------------|-----------|----------------------|------------------------------------------------------------------------------------------------------------------------------------|-----------------------------------------------------------------------------------------------------------------------------------------------------------------------|------------------|
| Argentina [1] | 1054      | Caeiro, Juan Pablo   | Hospital Privado Centro Medico de Cordoba S.A., Av. Naciones Unidas 346, X5016 Cordoba                                             | Comité Institucional de Etica de Investigacion en Salud (CIES) Av Naciones Unidas 346, X5016 Cordoba                                                                  | 08/Oct/2020      |
| Argentina [1] | 1071      | Ezcurra, Cecilia     | Hospital Aleman, Av. Pueyrredón 1640, Ciudad Autónoma de Buenos Aires C1118AAT                                                     | Comité de Ética Independiente del Hospital Alemán (CEIHA) Av. Pueyrredón 1640 - Ciudad Autónoma de Buenos Aires C1118AAT                                              | 17/Dec/2020      |
| Argentina [1] | 1060      | Giorgio, Patricia    | Hospital Britanico de Buenos Aires, Perdriel 74, CP 1280AEB, Ciudad Autónoma de Buenos Aires                                       | Comité de Revision Institucional Hospital Britanico CRIHB, Perdriel 74 - CP 1280AEB - Ciudad Autónoma de Buenos Aires                                                 | 08/Jun/2020      |
| Argentina [1] | 1061      | Herrera, Fabian      | CEMIC Galvan 4102, C1431FWO Ciudad Autónoma de Buenos Aires                                                                        | CEMIC Centro de Educación Médica e Investigaciones Clínicas "Norberto Quirno" Avenida E. Galván 4102, C1431FWO, Ciudad Autónoma de Buenos Aires                       | 15/Apr/2020      |
| Argentina [1] | 1047      | Nannini, Esteban     | Sanatorio Britanico S.A., Paraguay 40, Rosario, S2000 Santa Fe                                                                     | Comité de Etica Sanatorio Britanico SA, Paraguay 40, S2000, Santa Fe                                                                                                  | 18/Feb/2020      |
| Argentina [1] | 1046      | Sanchez, Marisa      | Hospital Italiano, Juan D. Perón 4190 Ciudad Autonoma Buenos Aires, C1181ACH                                                       | CEPI, Juan D Perón 4190, 4192 Capital Federal, C1199ABB                                                                                                               | 19/Mar/2020      |
| Austria [2]   | 1017      | Burgmann, Heinz      | AKH - Medizinische Universität Wien, Univ. Klinik für Innere Medizin I Waehringer Guertel 18 – 20, 1090 Wien                       | Ethikkommission der Medizinischen Universität Wien Borschkegasse 8b/E06, 1090 Wien                                                                                    | 10/Feb/2020      |
| Brazil [1]    | 1052      | Albuquerque, Natalia | Hospital Felício Rocho, Avenida do Contorno, 9530, Barro Preto, Belo Horizonte, Minas Gerais, 30110-934                            | Local: CEP do Hospital Felício Rocho, Rua Uberaba, nº 500, 5º andar, Núcleo de Ciências da Saúde Felício Rocho, Barro Preto, Belo Horizonte, Minas Gerais, 30.180-082 | 13/Dec/2019      |
| Brazil [1]    | 1049      | Rea-Neto, Alvaro     | CEPETI - Centro de Estudos e Pesquisa em Emergências Médicas e Terapia Intensiva Rua Monte Castelo, 366 Curitiba, Paraná 82530-200 | Local: CEP do Instituto de Neurologia de Curitiba (INC), Rua Jeremias Maciel Perretto, 300 - Campo Comprido, Curitiba - PR, 81210-310                                 | 29/Oct/2020      |

| Country      | Center ID | PI name                       | Center address                                                                                                                                      | Ethics Committee address                                                                                                                                      | Date of approval |
|--------------|-----------|-------------------------------|-----------------------------------------------------------------------------------------------------------------------------------------------------|---------------------------------------------------------------------------------------------------------------------------------------------------------------|------------------|
| Brazil [1]   | 1051      | Vargas Schwarzbold, Alexandre | Hospital da Universidade Federal de Santa Maria CEP/UFSM, HUSM-UFSM Av. Roraima, n° 1000, Predio 22, Camobi Santa Maria, Rio Grande do Sul 97105-90 | Local:<br>CEP do no Hospital Universitário de Santa Maria, Av. Roraima, 1000 - prédio da Reitoria - 7° andar - sala 763 – Camobi, Santa Maria, RS, 97.105-970 | 09/June/2020     |
| Brazil [1]   | 1048      | Starling, Carlos              | Hospital Vera Cruz Avenida do Contorno, 9495. andar 3 Belo Horizonte, Minas Gerais 30140-030                                                        | Local:<br>CEP do Hospital Vera Cruz, Rua Timbiras, 3156, 6° andar sala 603 - Barro Preto, Belo Horizonte, MG, 30.140-062                                      | 23/July/2020     |
| Brazil [1]   | 1053      | Zavascki, Alexandre           | Hospital Moinho de Vento, 910 Ramiro Barcelos Porto Alegre, Rio Grande do Sul 90035-004                                                             | Local:<br>CEP do Hospital Moinhos de Vento, Rua Tiradentes, 198 – Subsolo – Floresta, Porto Alegre, RS, 90.560-030                                            | 29/July/2020     |
| Brazil [1]   | All       |                               |                                                                                                                                                     | Central:<br>CONEP - Comissão Nacional de Ética em Pesquisa, SRNTV 701, Via W 5 Norte Edifício PO 700, 3° andar- Asa Norte 0719-049 Brasilia                   | 16/May/2020      |
| Colombia [1] | 1056      | Betancur Martinez, Julian     | Promotora Medica Las Americas SA, Diagonal 75 B No 2 A 80 – 140, Medellin 050025                                                                    | Comité de Ética en Investigación, Diagonal 75B 2 A-80/120 Piso 2, oficina 208, Medellín                                                                       | 19/Mar/2020      |
| Colombia [1] | 1057      | Marin, Jorge                  | Caja de Compensacion Familiar de Caldas / Confa Cl.57a # 9c-18 Manizales NA                                                                         | Comité de Ética Independiente Corporación CoEtika, Cra 30 N° 93 – 25 Avenida Alberto Mendoza Consultorio 410, Manizales-Caldas                                | 29/Jan/2020      |
| Colombia [1] | 1058      | Trompa, Ivan                  | IPS Universitaria Carrera 75 no 45e38 Medellin 2644                                                                                                 | Comité de Ética e Investigación de la “IPS Universitaria” Calle 69 #51C-24, Medellín                                                                          | 29/Jan/2020      |
| Colombia [1] | 1059      | Villegas, Maria Virginia      | Centro Medico Imbanaco Cra. 38 BIS No. 5B2 - 04 Cali 6489000                                                                                        | Comité de Ética en Investigación Centro Medico Imbanaco - CEICMI Carrera 38Bis # 5B4-29 Piso 2. Cali, Valle del Cauca                                         | 20/Feb/2020      |
| France [3]   | 1072      | Bleibtreu, Alexandre          | Groupe Hospitalier Pitié-Salpêtrière, 47-83 Bd de l'Hôpital, 75013 Paris                                                                            | Not required by local regulation                                                                                                                              |                  |
| France [3]   | 1021      | Gaborit, Benjamin             | CHU Nantes - Hôtel Dieu, 1 Pl. Alexis-Ricordeau, 44000 Nantes                                                                                       | Not required by local regulation                                                                                                                              |                  |
| France [3]   | 1042      | Lasocki, Sigismond            | CHU Angers - Hôpital Hôtel Dieu, Hôpital Hôtel Dieu, 4 rue Larrey, 49933 Angers                                                                     | Not required by local regulation                                                                                                                              |                  |

| Country     | Center ID | PI name               | Center address                                                                                                                         | Ethics Committee address                                                                                                                                 | Date of approval |
|-------------|-----------|-----------------------|----------------------------------------------------------------------------------------------------------------------------------------|----------------------------------------------------------------------------------------------------------------------------------------------------------|------------------|
| France [3]  | 1022      | Montravers, Philippe  | Hôpital Bichat - Claude Bernard, 46 Rue Henri Huchard, 75018 Paris                                                                     | Not required by local regulation                                                                                                                         |                  |
| France [3]  | 1018      | Senneville, Eric      | Centre Hospitalier de Tourcoing, 155 Rue du Président Coty, 59200 Tourcoing                                                            | Not required by local regulation                                                                                                                         |                  |
| Germany [2] | 1040      | Pletz, Matthias       | Universitaetsklinikum Jena, Parent Kochstrasse 2, 07747 Jena, Thuringen                                                                | Ethik-Kommission der Friedrich-Schiller Universität Jena, Bachstrasse 18, 07740 Thuringen                                                                | 14/Oct/2019      |
| Germany [2] | 1045      | Rohde, Gernot         | Klinikum der Johann Wolfgang GoetheUniversität, Pneumologie und Allergologie, Theodor-Stern-Kai 7, 60590 Frankfurt am Main, Hessen     | Ethik-Kommission des Fachbereichs Medizin der J.W. Goethe-Universität, Haus 1, Theodor-Stern-Kai 7, 60590 Frankfurt                                      | 27/Dec/2019      |
| Greece [2]  | 1031      | Gogos, Charalambos    | University Hospital of Patras, 265 04 Rio, Patras                                                                                      | Scientific Committee of University General Hospital of Patras, 26504 Rio, Patras                                                                         | 27/Aug/2020      |
| Greece [2]  | 1030      | Kourbeti, Irene       | General Hospital of Athens Laiko, 17, Agiou Thoma street, 11527 Athens                                                                 | Scientific Committee of General Hospital of Athens "Laiko", 17 Agiou Thoma street, 11527 Athens                                                          | 12/Dec/2019      |
| Italy [4]   | 1010      | Bassetti, Matteo      | IRCCS Ospedale Policlinico San Martino, Divisione di Ematologia e Trapianti, Largo Rosanna Benzi, 10, 16132 Genova                     | Comitato Etico San Martino, Ospedale Policlinico San Martino, IRCCS, Largo Rosanna Benzi, 10 16132 Genova                                                | 07/Oct/2019      |
| Italy [4]   | 1006      | De Rosa, Francesco    | Azienda Ospedaliero-Universitaria Città della Salute e della Scienza di Torino, Malattie Infettive, Corso Bramante 88-90, 10126 Torino | Comitato Etico - Azienda Ospedaliero-Universitaria, Città della Salute e della Scienza di Torino, Corso Bramante, 88, 10126 Torino                       | 12/Nov/2019      |
| Italy [4]   | 1035      | Menichetti, Francesco | Azienda Ospedaliero Universitaria Pisana, U.O. Malattie infettive, Via Roma 67, 56126 Pisa                                             | Comitato Etico Area Vasta Nord Ovest, Azienda Ospedaliero – Universitaria Pisana, via Roma 67, 56126 Pisa                                                | 08/Oct/2020      |
| Italy [4]   | 1007      | Tumbarello, Mario     | Fondazione Policlinico Universitario Agostino Gemelli IRCCS, UOC Malattie Infettive 2 Largo Agostino Gemelli 8, 00168 Roma             | Comitato Etico - Fondazione Policlinico Universitario Agostino Gemelli IRCCS, Università Cattolica del Sacro Cuore, Largo Agostino Gemelli 8, 00168 Roma | 20/Dec/2018      |
| Italy [4]   | 1009      | Viale, Pierluigi      | Azienda Ospedaliera Universitaria Policlinico Sant'Orsola Malpighi IRCCS, Infectious Diseases Unit, Via Massarenti 11, 40138 Bologna   | Comitato Etico Indipendente di Area Vasta Emilia Centro (CE-AVEC), via Albertoni 15, 40138 Bologna                                                       | 23/Jan/2019      |



| Country | Center ID | PI name             | Center address                                                                                                                        | Ethics Committee address                                                                                                                                                                                                                                                                                      | Date of approval |
|---------|-----------|---------------------|---------------------------------------------------------------------------------------------------------------------------------------|---------------------------------------------------------------------------------------------------------------------------------------------------------------------------------------------------------------------------------------------------------------------------------------------------------------|------------------|
| Russia  | All       |                     |                                                                                                                                       | Central:<br>Independent<br>Interdisciplinary Committee<br>for Ethical Examination of<br>Clinical Studies, 51,<br>Leningradskiy Prospect,<br>Moscow 125468                                                                                                                                                     | 31/Oct/2018      |
| Russia  | 1015      | Basin, Efim         | Regional Clinical Hospital<br>#1, 1 May 167, Krasnodar<br>350000                                                                      | Local Ethics Committee at<br>the State Budgetary<br>Institution of Healthcare<br>'Scientific and Research<br>Institute – Territorial<br>Clinical Hospital No. 1<br>named after S. V.<br>Ochapovskiy' of the<br>Ministry of Healthcare of<br>the Krasnodar Territory,<br>167, 1 Maya St., Krasnodar,<br>350086 | 29/Nov/2018      |
| Russia  | 1014      | Ivanov,<br>Vladimir | FSBI North-West Federal<br>Medical Research Center n.a.<br>V.A. Almazov of MoH RF,<br>2, Akkuratova str., Saint-<br>Petersburg 197341 | Local Ethics Committee at<br>Federal State Budgetary<br>Institution V.A. Almazov<br>National Medical Research<br>Center of the Ministry of<br>Health of the Russian<br>Federation 2 Akkuratova<br>Street, Saint Petersburg,<br>197341                                                                         | 19/Nov/2018      |
| Russia  | 1012      | Klyasova,<br>Galina | FSBI "Hematological<br>Research Center", MoH of<br>RF, Novo-Zykovskiy pr-d<br>4a, Moscow 125167                                       | Local Ethics Committee at<br>the Federal State Budgetary<br>Institution 'National<br>Medical Research Centre of<br>Haematology' of the<br>Ministry of Healthcare of<br>the Russian Federation, 4<br>Novy Zykovskiy Drive,<br>Moscow, 125167                                                                   | 20/Dec/2018      |
| Russia  | 1016      | Veselov,<br>Alexey  | FSBI "State Scientific Centre<br>of Coloproctology" of the<br>MoH of RF, 2, Salyama<br>Adilya str., Moscow 125679                     | Local Ethics Committee at<br>the Federal State Budgetary<br>Institution 'National<br>Medical Research Centre of<br>Coloproctology named after<br>A. N. Ryzhikh' of the<br>Ministry of Healthcare of<br>the Russian Federation 2<br>Salyama Adilya Str.,<br>Moscow 123423                                      | 29/Nov/2018      |
| Russia  | 1011      | Yakovlev,<br>Sergey | SBIH of Moscow City<br>Clinical Hospital # 7, 4<br>Kolomensky proezd,<br>Moscow 115446                                                | Ethics Committee of State<br>Budgetary Healthcare<br>Institution S.S. Yudin City<br>Clinical Hospital of the<br>Moscow Health<br>Department, 4 Kolomenskiy<br>Passage, Moscow                                                                                                                                 | 04/Mar/2019      |

| Country   | Center ID | PI name                       | Center address                                                                                                   | Ethics Committee address                                                                                                                                                                                                                                                                                            | Date of approval                |
|-----------|-----------|-------------------------------|------------------------------------------------------------------------------------------------------------------|---------------------------------------------------------------------------------------------------------------------------------------------------------------------------------------------------------------------------------------------------------------------------------------------------------------------|---------------------------------|
| Russia    | 1013      | Zolotukhin, Konstantin        | SBIH Republican Clinical Hospital n.a. G. G. Kuvatov, 132 Dostoevskogo street, Ufa 450005                        | Local Ethics Committee at the State Budgetary Institution of Healthcare 'Republican Clinical Hospital named after G.G. Kuvatov', 132, Dostoevskogo street, Ufa, 450005                                                                                                                                              | 28/Dec/2018                     |
| Spain [2] | 1005      | Carratala Fernandez, Jordi    | Hospital Universitari de Bellvitge, Servicio de Cardiologia Feixa Llarga s/n, 08907 Barcelona                    | Local:<br>Hospital Universitari de Bellvitge, Feixa Llarga s/n 08907 L'Hospitalet de Llobregat<br><br>Regional:<br>RA Catalunya : Direcció General de Ordenación Profesional y Regulación Sanitaria Departamento de Salud Travessera de les Corts 131-159, Pavelló Ave Maria, 08028 Barcelona                       | 07/May/2019<br><br>17/Sep/2019  |
| Spain [2] | 1001      | Castón, Juan José             | Hospital Universitario Reina Sofia, General medicine Dept, Avda. Menendez Pidal s/n, 14004 Córdoba               | Local:<br>Comité de etica de la Investigacion de Cordoba, Hospital Universitario Reina Sofia Edificio Consultas Externas, Planta - 1 Avda. Menéndez Pidal, s/n 14004 – Córdoba<br><br>Regional:<br>CEIC Autonomico de Andalucia, Avda. de la Innovación, s/n. Edificio Arena 1. Apdo. Correos 17.111. 41080 Seville | 19/May/2020<br><br>29/Mar/2019  |
| Spain [2] | 1002      | Pérez-Rodríguez, Maria Teresa | Complejo Hospitalario Universitario de Vigo, Carretera Clara Campoamor, 341, Babio, Beade Vigo, Pontevedra 36312 | CEIC de Galicia, subdirección General de Farmacia y Productos Sanitarios, Consellería de Sanidade, C/ San Lazaro, s/n, 15707 Santiago de Compostela                                                                                                                                                                 | 28/Mar/2019                     |
| Spain [2] | 1032      | Pintado, Vincente             | Hospital Universitario Ramon y Cajal, Infectious Diseases Dept, Ctra. de Colmenar Viejo km. 9,1; 28034 Madrid    | CEIC Hospital Universitario Ramon y Cajal, ctra. De Colmenar Viejo, km 9.1, 28034 Madrid<br><br>CEIC Regional de la Comunidad de Madrid : Área de Investigación Clínica y EPAS Servicio de Control Farmacéutico y Productos Sanitarios Consejería de Sanidad Calle Espronceda 24, 4ª planta, 28003 Madrid           | 04/Mar/2019<br><br>11/July/2019 |

| Country   | Center ID | PI name                      | Center address                                                                                                                         | Ethics Committee address                                                                                                                                                                                                                                                  | Date of approval               |
|-----------|-----------|------------------------------|----------------------------------------------------------------------------------------------------------------------------------------|---------------------------------------------------------------------------------------------------------------------------------------------------------------------------------------------------------------------------------------------------------------------------|--------------------------------|
| Spain [2] | 1003      | Soriano Viladomiu, Alejandro | Hospital Clinic de Barcelona, Servicio de Enfermedades Infecciosas, Villarroel, 170, 08036 Barcelona                                   | CEI Hospital Clínic de Barcelona C/ Rosselló, 138-baixos, despatx n° 12 08036 Barcelona<br><br>RA Catalunya : Direcció General de Ordenación Profesional y Regulación Sanitaria Departamento de Salud Travessera de les Corts 131-159, Pavelló Ave Maria, 08028 Barcelona | 12/Feb/2019<br><br>17/Sep/2019 |
| UK [5]    | 1036      | Felton, Timothy              | Wythenshawe Hospital, Respiratory and Allergy Clinical Research Facility, Charles Blackley Ward Manchester, Greater Manchester M23 9LT | Central:<br>London – South East Research Ethics Committee, Barlow House, 3 <sup>rd</sup> Floor<br>4 Minshull Street,<br>Manchester M1 3DZ                                                                                                                                 | 26/Nov/2018                    |
| UK [5]    | 1025      | Moore, Luke                  | Chelsea and Westminster Hospital, 369 Fulham Road, London, Greater London SW10 9NH                                                     |                                                                                                                                                                                                                                                                           |                                |
| UK [5]    | 1038      | Partridge, David             | Sheffield Teaching Hospital NHS Foundation Trust, Herries Road, Sheffield, South Yorkshire S5 7AU                                      |                                                                                                                                                                                                                                                                           |                                |
| UK [5]    | 1026      | Verma, Anita                 | Kings College Hospital NHS Foundation Trust, 161 Denmark Hill, London, Greater London SE5 8EF                                          |                                                                                                                                                                                                                                                                           |                                |

[1] A waiver of informed consent was approved for patients deceased or not contactable in Argentina, Brazil and Columbia.

[2] Consent for deceased patients (next of kin's) not applicable by local regulation.

[3] Informed consent not applicable by local regulation for retrospective studies based on secondary data (MR-004).

[4] Consent for deceased patients (next of kin's) and not contactable patients not applicable by local regulation for retrospective studies.

[5] Waiver of informed consent approved for all patients on 12 October 2020.
